# Supplementary material
Source: PubMed Central journal article supplement (PMC2409041)
Supplement: pp.108.117408_1.pdf [file pp.108.117408_1.pdf]

**Wild type**

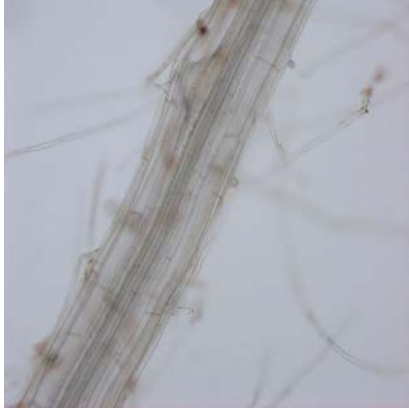

***oas-a1.1***

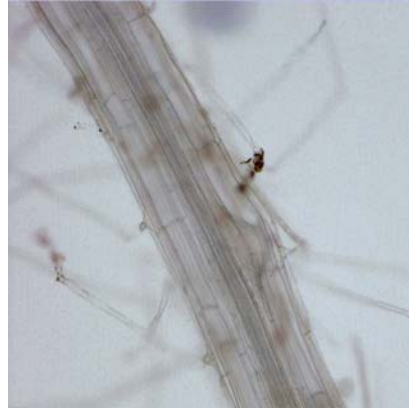

**Figure S1.** Bright field images of roots of hydroponically-grown wild type and *oas-a1.1* mutant plants observed in Fig. 7 for UV autofluorescence of lignin deposition.
