# Supplementary material
Source: PubMed Central journal article supplement (PMC2409041)
Supplement: pp.108.117408_2.pdf [file pp.108.117408_2.pdf]

**Table S3.** Groups of functionally related genes up-regulated in roots of the *oas-a1* mutant when compared with wild type

Genes with a fold change ( $\log_2$ [ratio between *oas-a1* roots and wild type roots]) higher than 2 and P value < 0.05 are shown in the table grouped by functional categories. Raw data can be found in the Supplemental material. The three genes more highly expressed in the mutant are highlighted.

| Functional category<br>(Locus identifier) | Annotation                                                                           | Fold change | P value |
|-------------------------------------------|--------------------------------------------------------------------------------------|-------------|---------|
| <b>Stress</b>                             |                                                                                      |             |         |
| AT3G54420                                 | Class IV chitinase (CHIV)                                                            | 3.47        | 0.001   |
| AT5G45070                                 | Disease resistance protein (TIR class), putative                                     | 3.37        | 0.000   |
| AT3G14200                                 | DNAJ heat shock N-terminal domain-containing protein                                 | 2.69        | 0.007   |
| AT5G49910                                 | Heat shock protein 70 / HSP70 (HSC70-7)                                              | 2.09        | 0.005   |
| AT2G17060                                 | Disease resistance protein (TIR-NBS-LRR class), putative                             | 2.07        | 0.003   |
| AT3G13650                                 | Disease resistance response protein-related/ similar to pathogenesis-related protein | 2.04        | 0.027   |
| <b>Oxidative stress-related</b>           |                                                                                      |             |         |
| AT2G36690                                 | Oxidoreductase, 2OG-Fe(II) oxygenase family protein                                  | 4.30        | 0.000   |
| AT1G19250                                 | Flavin-containing monooxygenase family protein / FMO family protein                  | 3.33        | 0.001   |
| AT5G45340                                 | Cytochrome P450 family protein                                                       | 2.84        | 0.002   |
| AT4G36430                                 | Peroxidase, identical to cDNA class III peroxidase ATP31                             | 2.49        | 0.005   |
| AT1G78340                                 | Gutathione S-transferase, putative                                                   | 2.42        | 0.015   |
| AT4G37400                                 | Cytochrome P450 family protein, similar to cytochrome P450 monooxygenase CYP91A2     | 2.29        | 0.000   |
| <b>Hormone signaling and metabolism</b>   |                                                                                      |             |         |
| AT3G24500                                 | Putative ethylene-responsive transcriptional coactivator MBF1                        | 4.19        | 0.013   |
| AT5G62920                                 | Two-component responsive regulator / response regulator 6 (ARR6)                     | 2.56        | 0.018   |
| AT4G34000                                 | ABA-responsive element-binding protein / (ABRE) / (ABF3)                             | 2.19        | 0.040   |
| AT5G51310                                 | Gibberellin 20-oxidase-related                                                       | 2.06        | 0.025   |
| <b>Development</b>                        |                                                                                      |             |         |
| AT3G30720                                 | Expressed protein, highly expressed in senescent leaves and mature pollen            | 4.04        | 0.000   |
| AT5G47060                                 | Senescence-associated protein-related, similar to SAG102                             | 2.31        | 0.034   |
| <b>RNA</b>                                |                                                                                      |             |         |
| AT1G10480                                 | Zinc finger (C2H2 type) family protein                                               | 3.02        | 0.002   |

|                                  |                                                                                           |      |       |
|----------------------------------|-------------------------------------------------------------------------------------------|------|-------|
| AT5G62430                        | Dof-type zinc finger domain-containing protein                                            | 2.89 | 0.027 |
| AT5G24120                        | RNA polymerase sigma subunit SigE                                                         | 2.24 | 0.024 |
| AT1G07350                        | Transformer serine/arginine-rich ribonucleoprotein, putative                              | 2.13 | 0.014 |
| <b>CHO metabolism</b>            |                                                                                           |      |       |
| AT5G11110                        | Similar to sucrose-phosphate synthase                                                     | 2.77 | 0.036 |
| AT1G78090                        | Trehalose-6-phosphate phosphatase (TPPB)                                                  | 2.31 | 0.001 |
| <b>Pentose-phosphate pathway</b> |                                                                                           |      |       |
| AT1G24280                        | Plastidic glucose-6-phosphate dehydrogenase                                               | 2.94 | 0.000 |
| <b>Lipid metabolism</b>          |                                                                                           |      |       |
| AT3G15650                        | Phospholipase/carboxylesterase family protein                                             | 2.55 | 0.007 |
| AT2G38180                        | GDSL-motif lipase/hydrolase family protein                                                | 2.52 | 0.001 |
| <b>Secondary metabolism</b>      |                                                                                           |      |       |
| AT5G66690                        | UDP-glucuronosyl/UDP-glucosyl transferase family protein                                  | 2.54 | 0.003 |
| AT3G51240                        | Naringenin 3-dioxygenase / flavanone 3-hydroxylase (F3H)                                  | 2.38 | 0.040 |
| AT3G50300                        | Transferase family protein, similar to anthranilate N-hydroxycinnamoyl/benzoyltransferase | 2.35 | 0.000 |
| <b>Metal handling</b>            |                                                                                           |      |       |
| AT5G01600                        | Ferritin 1 (FER1)                                                                         | 2.19 | 0.017 |
| <b>Transport</b>                 |                                                                                           |      |       |
| AT5G44110                        | ABC transporter family protein                                                            | 3.16 | 0.002 |
| AT4G10310                        | Sodium transporter AtHKT1                                                                 | 2.78 | 0.004 |
| AT3G27170                        | Chloride channel protein (CLC-b)                                                          | 2.58 | 0.000 |
| AT3G62270                        | Anion exchange family protein                                                             | 2.32 | 0.019 |
| AT1G59740                        | Proton-dependent oligopeptide transport (POT) family protein                              | 2.07 | 0.003 |
| AT4G10380                        | Major intrinsic family protein / MIP family protein                                       | 2.03 | 0.004 |
| AT5G02270                        | ABC transporter family protein, NBD-like protein POP                                      | 2.01 | 0.044 |
| <b>Miscellaneous</b>             |                                                                                           |      |       |
| AT5G54040                        | DC1 domain (rich in cysteines and histidines)-containing protein                          | 2.28 | 0.000 |
| AT2G39380                        | Exocyst subunit EXO70 family protein, putative exocyst subunits                           | 2.25 | 0.000 |
| AT1G67360                        | Rubber elongation factor (REF) family protein                                             | 2.23 | 0.047 |
| <b>Not assigned</b>              |                                                                                           |      |       |
| AT3G07090                        | Expressed protein                                                                         | 2.63 | 0.006 |
| AT1G17090                        | Expressed protein                                                                         | 2.29 | 0.023 |
| AT3G02910                        | Expressed protein                                                                         | 2.25 | 0.004 |
