# Supplementary material
Source: PubMed Central journal article supplement (PMC2409041)
Supplement: pp.108.117408_3.pdf [file pp.108.117408_3.pdf]

**Table S4.** Groups of functionally related genes up-regulated in shoots of the *oas-a1* mutant when compared with wild type

Genes with a fold change ( $\log_2$ [ratio between *oas-a1* shoots and wild type shoots]) higher than 2 and P value < 0.05 are shown in the table grouped by functional categories. Raw data can be found in the Supplemental material. The three genes more highly expressed in the mutant are highlighted.

| Functional category<br>(Locus Identifier) | Annotation                                                                                                                                                                  | Fold change | P value |
|-------------------------------------------|-----------------------------------------------------------------------------------------------------------------------------------------------------------------------------|-------------|---------|
| <b>Stress</b>                             |                                                                                                                                                                             |             |         |
| AT5G24780                                 | Vegetative storage protein 1 precursor (VSP1), response to jasmonic acid stimulus                                                                                           | 6.18        | 0.002   |
| AT5G37260                                 | Myb family transcription factor, response to salt stress; to abscisic acid, auxin, ethylene, gibberellic acid, jasmonic acid and salicylic acid stimuli                     | 4.37        | 0.002   |
| AT2G34810                                 | FAD-binding domain-containing protein, response to wounding and jasmonic acid stimulus                                                                                      | 3.21        | 0.007   |
| AT2G33380                                 | Calcium-binding RD20 protein (RD20), induced by abscisic acid during dehydration                                                                                            | 2.86        | 0.016   |
| AT3G19680                                 | Expressed protein, response to heat stress                                                                                                                                  | 2.77        | 0.002   |
| AT1G73010                                 | Expressed protein, similar to phosphatase, strong response to isoxaben and senescence                                                                                       | 2.47        | 0.052   |
| AT1G55260                                 | Protease inhibitor/seed storage/lipid transfer protein (LTP) family protein                                                                                                 | 2.44        | 0.031   |
| AT2G04030                                 | Heat shock protein, putative                                                                                                                                                | 2.34        | 0.001   |
| AT5G15950                                 | Adenosylmethionine decarboxylase family protein, spermidine biosynthetic process                                                                                            | 2.32        | 0.035   |
| AT4G19530                                 | Disease resistance protein (TIR-NBS-LRR class), putative                                                                                                                    | 2.25        | 0.012   |
| AT4G23600                                 | Cystine lyase, coronatine-responsive tyrosine aminotransferase, response to wounding, jasmonic acid and abscisic acid stimuli, hyperosmotic salinity, microbial phytotoxin  | 2.16        | 0.014   |
| AT3G28270                                 | Expressed protein, response to norflurazon, syringolin, and biotic stress                                                                                                   | 2.13        | 0.004   |
| AT4G37260                                 | Transcription factor activity, response to salt stress, abscisic acid, auxin, ethylene, gibberellic acid, jasmonic acid and salicylic acid stimuli, response to cadmium ion | 2.06        | 0.035   |
| AT4G09350                                 | DNAJ heat shock N-terminal domain-containing protein                                                                                                                        | 2.02        | 0.003   |
| <b>Oxidative stress-related</b>           |                                                                                                                                                                             |             |         |
| AT5G24770                                 | Vegetative storage protein 2 precursor (VSP2), response to oxidative stress                                                                                                 | 6.18        | 0.002   |
| AT1G56650                                 | Member of the R2R3 factor gene family, removal of superoxide radicals, response to salt stress and jasmonic acid stimulus                                                   | 3.83        | 0.007   |
| AT3G42570                                 | Peroxidase-related, response to oxidative stress                                                                                                                            | 2.54        | 0.000   |
| AT3G17070                                 | Peroxidase, putative, response to oxidative stress                                                                                                                          | 2.54        | 0.000   |
| AT2G34490                                 | Cytochrome P450 family protein                                                                                                                                              | 2.52        | 0.005   |
| AT1G13080                                 | Cytochrome P450 family protein, identical to cytochrome P450 monooxygenase                                                                                                  | 2.41        | 0.004   |

**Hormone signaling and metabolism**

|           |                                               |      |       |
|-----------|-----------------------------------------------|------|-------|
| AT1G72430 | Auxin-responsive protein-related              | 2.99 | 0.006 |
| AT5G24150 | Squalene monooxygenase 1,1                    | 2.75 | 0.004 |
| AT1G75080 | Brassinosteroid signalling positive regulator | 2.02 | 0.010 |
| AT1G19350 | Brassinosteroid signalling positive regulator | 2.02 | 0.010 |

**Development**

|           |                                                                                         |      |       |
|-----------|-----------------------------------------------------------------------------------------|------|-------|
| AT5G65870 | Phytosulfokines 5 (PSK5), cell proliferation, cell differentiation, organ morphogenesis | 3.18 | 0.006 |
| AT1G22160 | Senescence-associated protein-related                                                   | 2.69 | 0.008 |
| AT2G02450 | No apical meristem (NAM) family protein                                                 | 2.28 | 0.027 |

**Signaling**

|           |                                                                         |      |       |
|-----------|-------------------------------------------------------------------------|------|-------|
| AT4G33660 | Expressed protein, G-protein coupled receptor protein signaling pathway | 2.55 | 0.004 |
| AT2G02950 | Phytochrome kinase substrate 1 (PKS1)                                   | 2.13 | 0.012 |
| AT2G30520 | Signal transducer of phototropic response (RPT2)                        | 2.06 | 0.003 |

**Redox regulation**

|           |                             |      |       |
|-----------|-----------------------------|------|-------|
| AT3G62950 | Glutaredoxin family protein | 2.20 | 0.011 |
|-----------|-----------------------------|------|-------|

**RNA**

|           |                                                                    |      |       |
|-----------|--------------------------------------------------------------------|------|-------|
| AT1G51140 | Basic helix-loop-helix (bHLH) family protein                       | 3.68 | 0.000 |
| AT5G43270 | Squamosa promoter-binding protein-like 2 (SPL2)                    | 3.18 | 0.001 |
| AT2G34620 | Mitochondrial transcription termination factor-related             | 3.03 | 0.002 |
| AT5G67420 | LOB domain protein 37                                              | 2.99 | 0.009 |
| AT1G68520 | Zinc finger (B-box type) family protein                            | 2.62 | 0.000 |
| AT5G67480 | TAZ zinc finger family protein / BTB/POZ domain-containing protein | 2.54 | 0.001 |
| AT3G02830 | Zinc finger (CCCH-type) family protein                             | 2.54 | 0.000 |
| AT3G54810 | Zinc finger (GATA type) family protein                             | 2.37 | 0.017 |
| AT3G20810 | Transcription factor jumonji (jmiC) domain-containing protein      | 2.30 | 0.000 |
| AT3G07650 | Zinc finger (B-box type) family protein                            | 2.07 | 0.022 |
| AT1G49010 | Myb family transcription factor                                    | 2.01 | 0.017 |
| AT2G18300 | Basic helix-loop-helix (bHLH) family protein                       | 2.01 | 0.008 |

**Protein**

|           |                                                                                 |      |       |
|-----------|---------------------------------------------------------------------------------|------|-------|
| AT5G58140 | Protein kinase family protein / non phototropic hypocotyl 1-like protein (NPL1) | 2.72 | 0.001 |
| AT2G24280 | Serine carboxypeptidase S28 family protein                                      | 2.54 | 0.000 |
| AT3G20340 | Expressed protein, N-terminal protein myristoylation                            | 2.54 | 0.017 |
| AT5G59130 | Subtilase family protein                                                        | 2.51 | 0.015 |
| AT3G05640 | Protein phosphatase 2C, putative                                                | 2.25 | 0.031 |
| AT1G49200 | Zinc finger (C3HC4-type RING finger) family protein                             | 2.23 | 0.000 |
| AT4G02630 | Protein kinase family protein                                                   | 2.18 | 0.031 |
| AT5G45650 | Subtilase family protein                                                        | 2.07 | 0.007 |
| AT1G73390 | Expressed protein, N-terminal protein myristoylation                            | 2.04 | 0.022 |

**CHO metabolism**

|           |                                                                             |      |       |
|-----------|-----------------------------------------------------------------------------|------|-------|
| AT4G15210 | Beta-amylase (BMY1)                                                         | 4.95 | 0.019 |
| AT4G39330 | Mannitol dehydrogenase, putative                                            | 3.44 | 0.034 |
| AT4G10120 | Sucrose-phosphate synthase, putative                                        | 2.70 | 0.015 |
| AT2G37760 | Aldo/keto reductase family protein, similar to chalcone reductase           | 2.44 | 0.001 |
| AT4G39800 | Inositol-3-phosphate synthase isozyme 1/myo-inositol-1-phosphate synthase 1 | 2.27 | 0.013 |
| AT2G37770 | Aldo/keto reductase family protein, similar to chalcone reductase           | 2.21 | 0.013 |
| AT1G02850 | Glycosyl hydrolase family 1 protein                                         | 2.16 | 0.013 |
| AT3G23920 | Beta-amylase, putative                                                      | 2.15 | 0.028 |

**Cell wall**

|           |                                         |      |       |
|-----------|-----------------------------------------|------|-------|
| AT4G24000 | Cellulose synthase family protein       | 2.96 | 0.029 |
| AT2G01850 | Endoxyloglucan transferase              | 2.63 | 0.000 |
| AT4G19420 | Pectinacylesterase family protein       | 2.61 | 0.004 |
| AT1G57590 | Similar to pectinacylesterase, putative | 2.45 | 0.004 |

**TCA/C1-metabolism**

|           |                                                                          |      |       |
|-----------|--------------------------------------------------------------------------|------|-------|
| AT3G52720 | Carbonic anhydrase family protein                                        | 2.27 | 0.001 |
| AT1G53310 | Phosphoenolpyruvate carboxylase, putative, response to water deprivation | 2.20 | 0.007 |
| AT3G55630 | Dihydrofolate synthetase/folylpolyglutamate synthetase (DHFS/FPGS4)      | 2.11 | 0.036 |

**Lipid metabolism**

|           |                                                                                                                     |      |       |
|-----------|---------------------------------------------------------------------------------------------------------------------|------|-------|
| AT5G45950 | GDSL-motif lipase/hydrolase family protein                                                                          | 2.96 | 0.009 |
| AT3G11670 | Digalactosyldiacylglycerol synthase 1 (DGD1)/galactolipid galactosyltransferase                                     | 2.38 | 0.022 |
| AT2G11810 | 1,2-Diacylglycerol 3-beta-galactosyltransferase, putative/identical to monogalactosyldiacylglycerol synthase type C | 2.12 | 0.045 |
| AT1G28660 | Lipase                                                                                                              | 2.08 | 0.018 |
| AT1G28670 | Lipase                                                                                                              | 2.08 | 0.018 |

**Nucleotide metabolism**

|           |                                             |      |       |
|-----------|---------------------------------------------|------|-------|
| AT2G18230 | Inorganic pyrophosphatase (soluble) (PPase) | 3.12 | 0.000 |
|-----------|---------------------------------------------|------|-------|

**Secondary metabolism**

|           |                                                                                                                    |      |       |
|-----------|--------------------------------------------------------------------------------------------------------------------|------|-------|
| AT4G03070 | 2-Oxoglutarate-dependent dioxygenase (AOP1.2), 2OG-Fe(II) oxygenase superfamily domain, glucosinolate biosynthesis | 2.14 | 0.000 |
| AT5G57800 | CER1 protein, putative (WAX2)                                                                                      | 2.06 | 0.009 |
| AT2G29290 | Tropinone reductase, putative / tropine dehydrogenase, putative, oxidoreductase activity                           | 2.01 | 0.012 |

**Cell**

|           |                                             |      |       |
|-----------|---------------------------------------------|------|-------|
| AT5G10470 | Kinesin motor protein-related, TH65 protein | 2.39 | 0.002 |
|-----------|---------------------------------------------|------|-------|

**Photosynthesis**

|           |                 |      |       |
|-----------|-----------------|------|-------|
| ATCG00270 | PSII D2 protein | 2.45 | 0.008 |
|-----------|-----------------|------|-------|

**Metal handling**

|           |                   |      |       |
|-----------|-------------------|------|-------|
| AT5G01600 | Ferritin 1 (FER1) | 2.78 | 0.002 |
|-----------|-------------------|------|-------|

|                      |                                                                                          |      |       |
|----------------------|------------------------------------------------------------------------------------------|------|-------|
| AT3G56090            | Ferritin, putative                                                                       | 2.54 | 0.005 |
| AT2G40300            | Ferritin, putative                                                                       | 2.17 | 0.019 |
| <b>Transport</b>     |                                                                                          |      |       |
| AT5G06530            | ABC transporter family protein                                                           | 3.16 | 0.004 |
| AT2G36830            | Major intrinsic family protein, water channel activity                                   | 3.15 | 0.003 |
| AT2G37170            | Plasma membrane intrinsic protein 2B/aquaporin PIP2.2                                    | 2.97 | 0.002 |
| AT2G37180            | Plasma membrane intrinsic protein 2C/aquaporin PIP2.3                                    | 2.97 | 0.002 |
| AT2G36590            | Proline transporter, putative                                                            | 2.69 | 0.036 |
| AT4G22200            | Potassium channel protein                                                                | 2.62 | 0.000 |
| AT4G00430            | Plasma membrane intrinsic protein, water channel activity, response to water deprivation | 2.40 | 0.012 |
| AT2G26690            | Nitrate transporter (NTP2), response to wounding and jasmonic acid stimulus              | 2.22 | 0.004 |
| AT3G05030            | Sodium proton exchanger, putative (NHX2)                                                 | 2.14 | 0.004 |
| AT1G64780            | Ammonium transporter 1, member 2 (AtAMT1;2)                                              | 2.13 | 0.029 |
| AT2G47800            | Glutathione-conjugate transporter (MRP4), response to nematode and water deprivation     | 2.09 | 0.008 |
| AT4G37270            | Cadmium/zinc-transporting ATPase, putative (HMA1), copper-exporting ATPase activity      | 2.06 | 0.035 |
| AT3G53420            | Plasma membrane intrinsic protein 2A (PIP2A) / aquaporin PIP2.1                          | 2.03 | 0.001 |
| AT2G45960            | Plasma membrane intrinsic protein 1B (PIP1B) / aquaporin PIP1.2                          | 2.01 | 0.000 |
| <b>Miscellaneous</b> |                                                                                          |      |       |
| AT5G02230            | Haloacid dehalogenase-like hydrolase family protein                                      | 3.42 | 0.001 |
| AT5G58770            | Dehydrololichyl diphosphate synthase, putative                                           | 2.63 | 0.026 |
| AT1G01320            | Tetratricopeptide repeat (TPR)-containing protein                                        | 2.51 | 0.000 |
| AT3G61220            | Short-chain dehydrogenase/reductase (SDR) family protein, oxidoreductase activity        | 2.47 | 0.009 |
| AT4G33670            | L-galactose dehydrogenase (L-GalDH)                                                      | 2.31 | 0.006 |
| AT5G19130            | GPI transamidase component family protein                                                | 2.30 | 0.012 |
| AT4G14930            | Acid phosphatase survival protein SurE, putative, acid phosphatase activity              | 2.12 | 0.006 |
| AT1G22370            | UDP-glucuronosyl/UDP-glucosyl transferase family protein                                 | 2.06 | 0.016 |
| <b>Not assigned</b>  |                                                                                          |      |       |
| AT3G30720            | Expressed protein                                                                        | 4.06 | 0.000 |
| AT5G62140            | Expressed protein                                                                        | 2.94 | 0.000 |
| AT4G28080            | Expressed protein                                                                        | 2.70 | 0.001 |
| AT1G69760            | Expressed protein                                                                        | 2.40 | 0.021 |
| AT4G33666            | Expressed protein                                                                        | 2.31 | 0.006 |
| AT5G19120            | Expressed protein                                                                        | 2.30 | 0.012 |
| AT1G56580            | Expressed protein                                                                        | 2.01 | 0.022 |
