# Supplementary material
Source: PubMed Central journal article supplement (PMC2409041)
Supplement: pp.108.117408_4.pdf [file pp.108.117408_4.pdf]

**Table S5.** Groups of functionally related genes down-regulated in roots of the *oas-a1* mutant when compared with wild type

Genes with a fold change ( $\log_2$ [ratio between *oas-a1* roots and wild type roots]) lower than 0.5 and P value < 0.05 are shown in the table grouped by functional categories. Raw data can be found in the Supplemental material. The three genes with the lowest expression in the mutant are highlighted.

| Functional category<br>(Locus identifier) | Annotation                                                                                        | Fold change | P Value |
|-------------------------------------------|---------------------------------------------------------------------------------------------------|-------------|---------|
| <b>Stress</b>                             |                                                                                                   |             |         |
| AT5G47240                                 | MutT/nudix family protein, jasmonic-responsive, senescence induced                                | 0.20        | 0.000   |
| AT5G39890                                 | Expressed protein, strongly induced by anoxia and hypoxia                                         | 0.24        | 0.015   |
| AT3G30775                                 | Proline oxidase, mitochondrial /Osmotic stress-responsive proline dehydrogenase (POX)             | 0.30        | 0.001   |
| AT1G80920                                 | DNAJ heat shock N-terminal domain-containing protein                                              | 0.37        | 0.016   |
| AT1G56300                                 | DNAJ heat shock N-terminal domain-containing protein                                              | 0.49        | 0.012   |
| <b>Hormone signaling and metabolism</b>   |                                                                                                   |             |         |
| AT1G72360                                 | Member of the ERF (ethylene response factor) subfamily B-2 of ERF/AP2 transcription factor family | 0.30        | 0.016   |
| AT4G37390                                 | IAA-amido synthase, auxin-responsive                                                              | 0.37        | 0.004   |
| AT1G59500                                 | IAA-amido synthase                                                                                | 0.37        | 0.004   |
| AT5G61590                                 | Member of the ERF (ethylene response factor) subfamily B-3 of ERF/AP2 transcription factor family | 0.40        | 0.047   |
| AT5G08350                                 | GRAM domain-containing protein / ABA-responsive protein-related                                   | 0.49        | 0.009   |
| <b>Development</b>                        |                                                                                                   |             |         |
| AT4G35770                                 | Senescence-associated protein (SEN1)                                                              | 0.06        | 0.009   |
| AT1G15040                                 | Glutamine amidotransferase-related, senescence induced                                            | 0.13        | 0.023   |
| AT2G20670                                 | Expressed protein, strongly induced by senescence                                                 | 0.22        | 0.014   |
| AT4G08300                                 | Nodulin MtN21 family protein                                                                      | 0.29        | 0.005   |
| AT2G32150                                 | Haloacid dehalogenase-like hydrolase family protein, strongly induced by senescence               | 0.31        | 0.005   |
| AT5G66170                                 | Senescence-associated family protein                                                              | 0.44        | 0.045   |
| AT4G08290                                 | Nodulin MtN21 family protein                                                                      | 0.46        | 0.028   |
| <b>Redox regulation</b>                   |                                                                                                   |             |         |
| AT5G61440                                 | Thioredoxin family protein                                                                        | 0.44        | 0.029   |
| <b>RNA</b>                                |                                                                                                   |             |         |
| AT1G13260                                 | DNA-binding protein RAV1 (RAV1)                                                                   | 0.32        | 0.004   |
| AT2G25900                                 | Putative Cys3His zinc finger protein (ATCTH)                                                      | 0.35        | 0.010   |
| AT5G28770                                 | bZIP transcription factor family protein                                                          | 0.36        | 0.005   |

|                              |                                                                                               |      |       |
|------------------------------|-----------------------------------------------------------------------------------------------|------|-------|
| AT5G37540                    | Aspartyl protease family protein, weak similarity to chloroplast nucleoid DNA binding protein | 0.45 | 0.030 |
| AT5G47390                    | Myb family transcription factor                                                               | 0.48 | 0.042 |
| <b>Protein</b>               |                                                                                               |      |       |
| AT5G22920                    | Zinc finger (C3HC4-type RING finger) family protein                                           | 0.20 | 0.000 |
| AT4G03510                    | Zinc finger (C3HC4-type RING finger) family protein (RMA1)                                    | 0.26 | 0.008 |
| AT4G38470                    | Protein kinase family protein                                                                 | 0.28 | 0.000 |
| AT5G24490                    | 30S ribosomal protein, putative                                                               | 0.34 | 0.006 |
| AT3G23880                    | F-box family protein, contains F-box domain                                                   | 0.35 | 0.007 |
| AT1G23390                    | Kelch repeat-containing F-box family protein                                                  | 0.36 | 0.004 |
| AT1G80440                    | Kelch repeat-containing F-box family protein                                                  | 0.37 | 0.016 |
| AT4G37610                    | TAZ zinc finger family protein / BTB/POZ domain-containing protein                            | 0.37 | 0.005 |
| AT4G28270                    | Zinc finger (C3HC4-type RING finger) family protein                                           | 0.37 | 0.003 |
| AT3G48360                    | Speckle-type POZ protein-related                                                              | 0.41 | 0.025 |
| AT1G61590                    | Protein kinase, putative                                                                      | 0.41 | 0.007 |
| AT3G59940                    | Kelch repeat-containing F-box family protein                                                  | 0.46 | 0.004 |
| AT4G11360                    | RING-H2 finger protein RHA1b                                                                  | 0.48 | 0.025 |
| AT1G24440                    | Expressed protein, similar to MTD2                                                            | 0.49 | 0.013 |
| AT3G43430                    | Zinc finger (C3HC4-type RING finger) family protein (RMA1)                                    | 0.50 | 0.009 |
| <b>CHO metabolism</b>        |                                                                                               |      |       |
| AT2G19800                    | MIOX2- Myoinositol oxygenase 2                                                                | 0.25 | 0.000 |
| AT5G18670                    | Beta-amylase, putative (BMY3)                                                                 | 0.30 | 0.001 |
| AT5G56870                    | Beta-galactosidase, putative / lactase, putative                                              | 0.32 | 0.024 |
| AT1G70290                    | Trehalose-6-phosphate synthase, putative, (UDP-forming)                                       | 0.35 | 0.001 |
| AT5G20250                    | Similar to alkaline alpha galactosidase, putative                                             | 0.38 | 0.014 |
| AT1G80380                    | Phosphoribulokinase/uridine kinase-related                                                    | 0.39 | 0.001 |
| AT1G61820                    | Glycosyl hydrolase family 1 protein                                                           | 0.46 | 0.013 |
| AT3G57520                    | Alkaline alpha galactosidase, putative                                                        | 0.48 | 0.033 |
| <b>Fermentation</b>          |                                                                                               |      |       |
| AT4G33070                    | Pyruvate decarboxylase, putative                                                              | 0.10 | 0.008 |
| <b>Lipid metabolism</b>      |                                                                                               |      |       |
| AT5G41080                    | Glycerophosphoryl diester phosphodiesterase family protein                                    | 0.14 | 0.000 |
| <b>S-assimilation</b>        |                                                                                               |      |       |
| AT5G67520                    | Adenylylsulfate kinase, chloroplast precursor (APS kinase)                                    | 0.44 | 0.008 |
| <b>Nucleotide metabolism</b> |                                                                                               |      |       |
| AT1G30820                    | CTP synthase, putative / UTP--ammonia ligase, putative                                        | 0.39 | 0.003 |
| <b>Secondary metabolism</b>  |                                                                                               |      |       |
| AT5G48110                    | Terpene synthase/cyclase family protein                                                       | 0.42 | 0.025 |
| <b>Cell</b>                  |                                                                                               |      |       |
| AT1G52250                    | Dynein light chain type 1 family protein                                                      | 0.23 | 0.004 |

**Transport**

|           |                                                             |      |       |
|-----------|-------------------------------------------------------------|------|-------|
| AT5G47560 | Encodes a tonoplast malate/fumarate transporter             | 0.47 | 0.004 |
| AT2G24240 | Potassium channel tetramerisation domain-containing protein | 0.50 | 0.031 |
| AT5G04770 | Amino acid permease family protein                          | 0.50 | 0.001 |

**Miscellaneous**

|           |                                                                                         |      |       |
|-----------|-----------------------------------------------------------------------------------------|------|-------|
| AT1G09460 | Glucan endo-1,3-beta-glucosidase-related                                                | 0.32 | 0.003 |
| AT5G19130 | GPI transamidase component family protein                                               | 0.34 | 0.003 |
| AT2G02710 | PAC motif-containing protein, similar to nonphototropic hypocotyl 1                     | 0.34 | 0.007 |
| AT3G61060 | F-box family protein / lectin-related                                                   | 0.39 | 0.004 |
| AT5G52710 | Heavy-metal-associated domain-containing protein                                        | 0.41 | 0.040 |
| AT5G05890 | UDP-glucuronosyl/UDP-glucosyl transferase family protein                                | 0.45 | 0.000 |
| AT4G18340 | Glycosyl hydrolase family 17 protein, similar to elicitor inducible chitinase Nt-SubE76 | 0.46 | 0.000 |
| AT5G62340 | Invertase/pectin methylesterase inhibitor family protein                                | 0.47 | 0.016 |
| AT3G14050 | RelA/SpoT protein, putative (RSH2)                                                      | 0.48 | 0.026 |
| AT1G62770 | Invertase/pectin methylesterase inhibitor family protein                                | 0.50 | 0.025 |

**Not assigned**

|           |                                                                                       |      |       |
|-----------|---------------------------------------------------------------------------------------|------|-------|
| AT1G33055 | Expressed protein                                                                     | 0.21 | 0.030 |
| AT2G40000 | Expressed protein                                                                     | 0.29 | 0.021 |
| AT1G76590 | Zinc-binding family protein                                                           | 0.32 | 0.003 |
| AT4G33980 | Expressed protein                                                                     | 0.34 | 0.000 |
| AT1G05575 | Expressed protein                                                                     | 0.34 | 0.029 |
| AT5G19120 | Expressed protein, low similarity to extracellular dermal glycoprotein EDGP precursor | 0.34 | 0.003 |
| AT4G19980 | Expressed protein                                                                     | 0.35 | 0.040 |
| AT3G07310 | Expressed protein                                                                     | 0.36 | 0.003 |
| AT5G28610 | Expressed protein                                                                     | 0.36 | 0.004 |
| AT2G15890 | Expressed protein                                                                     | 0.36 | 0.000 |
| AT1G76600 | Expressed protein                                                                     | 0.37 | 0.015 |
| AT4G19160 | Expressed protein                                                                     | 0.39 | 0.003 |
| AT4G16000 | Expressed protein                                                                     | 0.42 | 0.018 |
| AT3G10020 | Expressed protein                                                                     | 0.42 | 0.010 |
| AT5G24890 | Expressed protein, weak similarity to MTD1                                            | 0.42 | 0.008 |
| AT2G27830 | Expressed protein                                                                     | 0.44 | 0.003 |
| AT4G23870 | Expressed protein                                                                     | 0.46 | 0.005 |
| AT5G15120 | Expressed protein                                                                     | 0.47 | 0.024 |
| AT3G11420 | Fringe-related protein                                                                | 0.48 | 0.025 |
| AT5G66050 | Expressed protein                                                                     | 0.48 | 0.010 |
| AT4G36500 | Expressed protein                                                                     | 0.49 | 0.030 |
| AT2G46550 | Expressed protein                                                                     | 0.50 | 0.040 |

---
