# Supplementary material
Source: PubMed Central journal article supplement (PMC2409041)
Supplement: pp.108.117408_5.pdf [file pp.108.117408_5.pdf]

**Table S6.** Groups of functionally related genes down-regulated in shoots of the *oas-a1* mutant when compared with wild type

Genes with a fold change ( $\log_2$ [ratio between *oas-a1* shoots and wild type shoots]) lower than 0.5 and P value < 0.05 are shown in the table grouped by functional categories. Raw data can be found in the Supplemental material. The three genes with the lowest expression in the mutant are highlighted.

| Functional category<br>(Locus identifier) | Annotation                                                                                                                                                   | Fold change |
|-------------------------------------------|--------------------------------------------------------------------------------------------------------------------------------------------------------------|-------------|
| <b>Stress</b>                             |                                                                                                                                                              |             |
| AT2G40750                                 | WRKY family transcription factor, strongly induced by salicylic acid                                                                                         | 0.30        |
| AT3G22231                                 |                                                                                                                                                              |             |
|                                           | Pathogen and circadian controlled 1(PCC1), response to both virulent and avirulent strains of <i>Pseudomonas syringae</i> pv. Tomato, and response to fungus | 0.30        |
| AT1G65390                                 | Disease resistance protein (TIR class), putative, domain signature TIR exists, suggestive of a disease resistance protein                                    | 0.35        |
| AT1G72900                                 | Disease resistance protein (TIR-NBS class), putative, domain signature TIR-NBS exists, suggestive of a disease resistance protein                            | 0.36        |
| AT1G72940                                 | Disease resistance protein (TIR-NBS class), putative, domain signature TIR-NBS exists, suggestive of a disease resistance protein                            | 0.39        |
| AT4G16860                                 | Disease resistance protein (TIR-NBS-LRR class), putative, domain signature TIR-NBS-LRR exists, suggestive of a disease resistance protein                    | 0.41        |
| AT1G66090                                 | Disease resistance protein (TIR-NBS class), putative, domain signature TIR-NBS exists, suggestive of a disease resistance protein                            | 0.42        |
| AT4G02380                                 |                                                                                                                                                              |             |
|                                           | Late embryogenesis abundant 3 family protein / LEA3 family protein, similar to several small proteins induced by heat, auxin, ethylene and wounding          | 0.43        |
| AT3G30775                                 | Proline oxidase, mitochondrial / osmotic stress-responsive proline dehydrogenase (POX)                                                                       | 0.49        |
| <b>Oxidative stress-related</b>           |                                                                                                                                                              |             |
| AT5G57220                                 | Cytochrome P450, putative, member of CYP81F, strongly induced by hydrogen peroxide                                                                           | 0.38        |
| AT2G27690                                 | Cytochrome P450, putative, member of CYP94C, jasmonic acid responsive                                                                                        | 0.38        |
| <b>Hormone signaling and metabolism</b>   |                                                                                                                                                              |             |
| AT1G74670                                 | Gibberellin-responsive protein, putative, similar Gibberellin-regulated protein 4 precursor                                                                  | 0.28        |
| AT3G15210                                 | Member of the ERF (ethylene response factor) subfamily B-1 of ERF/AP2 transcription factor family                                                            | 0.32        |
| AT3G21780                                 | UDP-glucuronosyl/UDP-glucosyl transferase family protein                                                                                                     | 0.47        |
| AT3G63110                                 | Adenylate isopentenyltransferase 3 / cytokinin synthase (IPT3)                                                                                               | 0.49        |
| <b>Development</b>                        |                                                                                                                                                              |             |
| AT5G45890                                 | Senescence-specific SAG12 protein (SAG12) / cysteine proteinase                                                                                              | 0.16        |
| AT3G54150                                 | Embryo-abundant protein-related                                                                                                                              | 0.35        |
| AT1G55450                                 | Embryo-abundant protein-related                                                                                                                              | 0.46        |
| <b>Signaling</b>                          |                                                                                                                                                              |             |
| AT1G73800                                 | Calmodulin-binding protein                                                                                                                                   | 0.32        |

|                       |                                                                                            |      |
|-----------------------|--------------------------------------------------------------------------------------------|------|
| AT1G73805             | Calmodulin-binding protein                                                                 | 0.39 |
| AT1G73630             | Calcium-binding protein, putative                                                          | 0.41 |
| AT4G04540             | Protein kinase family protein                                                              | 0.41 |
| AT4G04570             | Protein kinase family protein                                                              | 0.41 |
| AT1G56120             | Leucine-rich repeat family protein                                                         | 0.42 |
| AT1G56130             | Leucine-rich repeat family protein                                                         | 0.42 |
| AT1G56140             | Leucine-rich repeat family protein                                                         | 0.42 |
| AT4G18250             | Receptor serine/threonine kinase, putative                                                 | 0.43 |
| AT3G47480             | Calcium-binding EF hand family protein                                                     | 0.46 |
| AT1G21270             | Wall-associated kinase 2 (WAK2), response to salicylic acid stimulus                       | 0.47 |
| AT3G55950             | Protein kinase family protein, similar to cytokinin-regulated kinase 1 (Nicotiana tabacum) | 0.47 |
| AT1G33600             | Leucine-rich repeat family protein, LRR domains                                            | 0.47 |
| AT1G51660             | Mitogen-activated protein kinase kinase (MAPKK), identical to MAP kinase kinase 4          | 0.47 |
| AT1G53430             | Leucine-rich repeat family protein                                                         | 0.48 |
| AT4G02420             | Lectin protein kinase, putative, similar to receptor lectin kinase 3                       | 0.49 |
| <b>RNA</b>            |                                                                                            |      |
| AT4G25480             | Member of the DREB subfamily A-1 of ERF/AP2 transcription factor family (CBF3)             | 0.24 |
| AT3G56710             | SigA-binding protein (SIB1)                                                                | 0.37 |
| AT5G65310             | Homeobox-leucine zipper protein ATHB-5                                                     | 0.37 |
| AT3G11840             | U-box domain-containing protein                                                            | 0.40 |
| AT2G46400             | WRKY family transcription factor                                                           | 0.42 |
| AT2G38470             | WRKY family transcription factor, defense response to bacterium and fungus                 | 0.44 |
| AT5G22570             | WRKY family transcription factor                                                           | 0.46 |
| AT5G07100             | WRKY family transcription factor (WRKY26)                                                  | 0.48 |
| <b>Protein</b>        |                                                                                            |      |
| AT1G66940             | Protein kinase-related                                                                     | 0.34 |
| AT1G07430             | Protein phosphatase 2C, putative                                                           | 0.42 |
| AT4G25110             | Latex-abundant family protein (AMC2) / caspase family protein                              | 0.45 |
| AT2G01150             | Zinc finger (C3HC4-type RING finger) family protein                                        | 0.46 |
| AT5G27420             | Zinc finger (C3HC4-type RING finger) family protein                                        | 0.49 |
| <b>CHO metabolism</b> |                                                                                            |      |
| AT3G13750             | Beta-galactosidase, putative / lactase, putative                                           | 0.32 |
| AT3G47800             | Aldose 1-epimerase family protein                                                          | 0.43 |
| <b>Cell wall</b>      |                                                                                            |      |
| AT1G69530             | Expansin (At-EXP1), alpha-expansin gene family                                             | 0.25 |
| AT2G18660             | Expansin family protein (EXPR3), identical to Expansin-related protein 3 precursor         | 0.29 |
| AT2G26440             | Pectinesterase family protein                                                              | 0.40 |
| AT4G23820             | Glycoside hydrolase family 28 protein / polygalacturonase (pectinase) family protein       | 0.41 |

|                       |                                                                                                                     |      |
|-----------------------|---------------------------------------------------------------------------------------------------------------------|------|
| AT2G46330             | Arabinogalactan-protein (AGP16)                                                                                     | 0.44 |
| AT5G57550             | Xyloglucan:xyloglucosyl transferase / xyloglucan endotransglycosylase / endo-xyloglucan transferase (XTR3)          | 0.47 |
| <b>N-metabolism</b>   |                                                                                                                     |      |
| AT5G18170             | Glutamate dehydrogenase 1 (GDH1)                                                                                    | 0.41 |
| <b>S-assimilation</b> |                                                                                                                     |      |
| AT4G21990             | 5'-Adenylylsulfate reductase, APS reductase 3 (APR3)                                                                | 0.35 |
| <b>Cell</b>           |                                                                                                                     |      |
| AT3G52400             | Syntaxin, putative (SYP122)                                                                                         | 0.40 |
| AT5G54610             | Ankyrin repeat family protein                                                                                       | 0.43 |
| AT2G18290             | Anaphase-promoting complex, subunit 10 family / APC10 family                                                        | 0.49 |
| <b>DNA</b>            |                                                                                                                     |      |
| AT3G46030             | Histone H2B, putative                                                                                               | 0.39 |
| <b>Photosynthesis</b> |                                                                                                                     |      |
| AT3G27690             | Chlorophyll A-B binding protein (LHCB2:4)                                                                           | 0.33 |
| <b>Transport</b>      |                                                                                                                     |      |
| AT4G36670             | Mannitol transporter, putative, major facilitator superfamily protein                                               | 0.15 |
| AT3G23550             | MATE efflux family protein, similar to ripening regulated protein DDTFR18, multidrug transport                      | 0.17 |
| AT3G62150             | Multidrug resistant (MDR) ABC transporter, putative                                                                 | 0.44 |
| AT1G19450             | Integral membrane protein, putative / sugar transporter family protein                                              | 0.44 |
| AT1G11260             | Glucose transporter (STP1)                                                                                          | 0.46 |
| AT1G08930             | Sugar transporter family protein / Early-responsive to dehydration stress protein (ERD6)                            | 0.49 |
| AT1G64170             | Cation/hydrogen exchanger, putative, member of Putative Na <sup>+</sup> /H <sup>+</sup> antiporter family (ATCHX16) | 0.49 |
| <b>Miscellaneous</b>  |                                                                                                                     |      |
| AT3G57240             | Similar to glycosyl hydrolase family 17 protein, beta-1,3-glucanase 3                                               | 0.22 |
| AT5G03350             | Legume lectin family protein                                                                                        | 0.25 |
| AT1G21130             | O-Methyltransferase, putative                                                                                       | 0.37 |
| AT3G14050             | RelA/SpoT protein, putative (RSH2)                                                                                  | 0.38 |
| AT3G01290             | Band 7 family protein, similar to hypersensitive-induced response protein (Zea mays)                                | 0.39 |
| AT1G17430             | Hydrolase, alpha/beta fold family protein                                                                           | 0.42 |
| AT2G30600             | BTB/POZ domain-containing protein                                                                                   | 0.43 |
| AT3G47810             | Homolog of yeast retromer subunit VPS29 involved in endosome to lysosome protein transport                          | 0.43 |
| AT2G35190             | Novel plant SNARE 11 (NPSN11)                                                                                       | 0.45 |
| AT1G78270             | UDP-glucose glucosyltransferase, putative                                                                           | 0.46 |
| AT1G73480             | Hydrolase, alpha/beta fold family protein                                                                           | 0.47 |
| AT2G31990             | Exostosin family protein                                                                                            | 0.47 |
| AT1G13210             | Haloacid dehalogenase-like hydrolase family protein                                                                 | 0.48 |
| AT3G62780             | C2 domain-containing protein                                                                                        | 0.48 |
| <b>Not assigned</b>   |                                                                                                                     |      |

|           |                                                                            |      |
|-----------|----------------------------------------------------------------------------|------|
| AT2G14560 | Expressed protein                                                          | 0.33 |
| AT2G30010 | Expressed protein                                                          | 0.34 |
| AT3G44450 | Expressed protein                                                          | 0.35 |
| AT1G78410 | VQ motif-containing protein                                                | 0.36 |
| AT5G05300 | Expressed protein                                                          | 0.36 |
| AT3G46110 | Expressed protein                                                          | 0.37 |
| AT2G36220 | Expressed protein                                                          | 0.42 |
| AT2G42040 | Expressed protein                                                          | 0.42 |
| AT3G27770 | Expressed protein                                                          | 0.42 |
| AT3G04640 | Glycine-rich protein                                                       | 0.45 |
| AT1G17665 | Expressed protein                                                          | 0.46 |
| AT2G28400 | Expressed protein                                                          | 0.46 |
| AT4G34260 | Expressed protein                                                          | 0.47 |
| AT3G22240 | Expressed protein                                                          | 0.47 |
| AT1G48330 | Expressed protein                                                          | 0.47 |
| AT1G74440 | Expressed protein, similar to YGL010w-like protein                         | 0.48 |
| AT2G34510 | Expressed protein                                                          | 0.49 |
| AT1G75180 | Expressed protein                                                          | 0.50 |
| AT1G11210 | Expressed protein, contains similarity to cotton fiber expressed protein 1 | 0.50 |

---
